# Supplementary material for: Pharmacokinetic, Tissue Distribution, Metabolite, and Toxicity Evaluation of the Matrine Derivative, (6aS, 10S, 11aR, 11bR, 11cS)-10-Methylaminododecahydro-3a, 7a-Diaza-benzo (de) Anthracene-8-thione
Source: MDPI journal article supplement (doi:10.3390/molecules29020297), 2024-01-06
Supplement: s1 [file s1]

### Supplementary Figure S1-S3

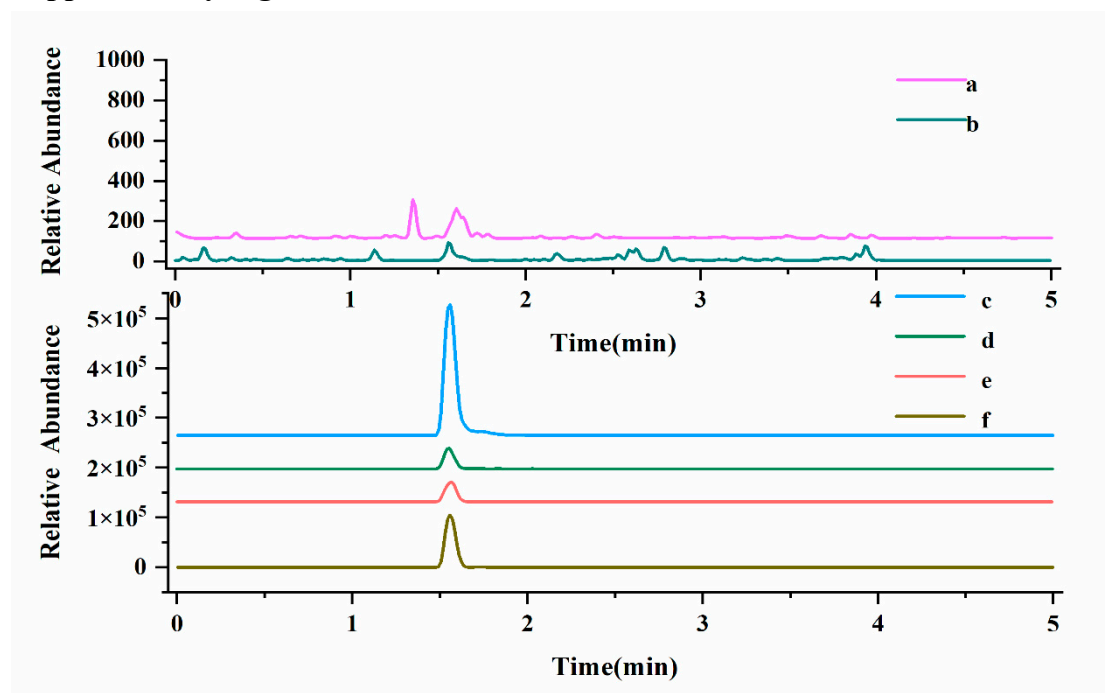

**Supplementary Figure S1** Representative EIC of different plasma samples. a: EIC of MASM in control plasma; b: EIC of IS in control plasma; c: EIC of MASM in plasma of rats after administration; d: EIC of IS added in plasma of rats after administration of MASM; e: EIC of IS added in control plasma; f: EIC of MASM added in control plasma.

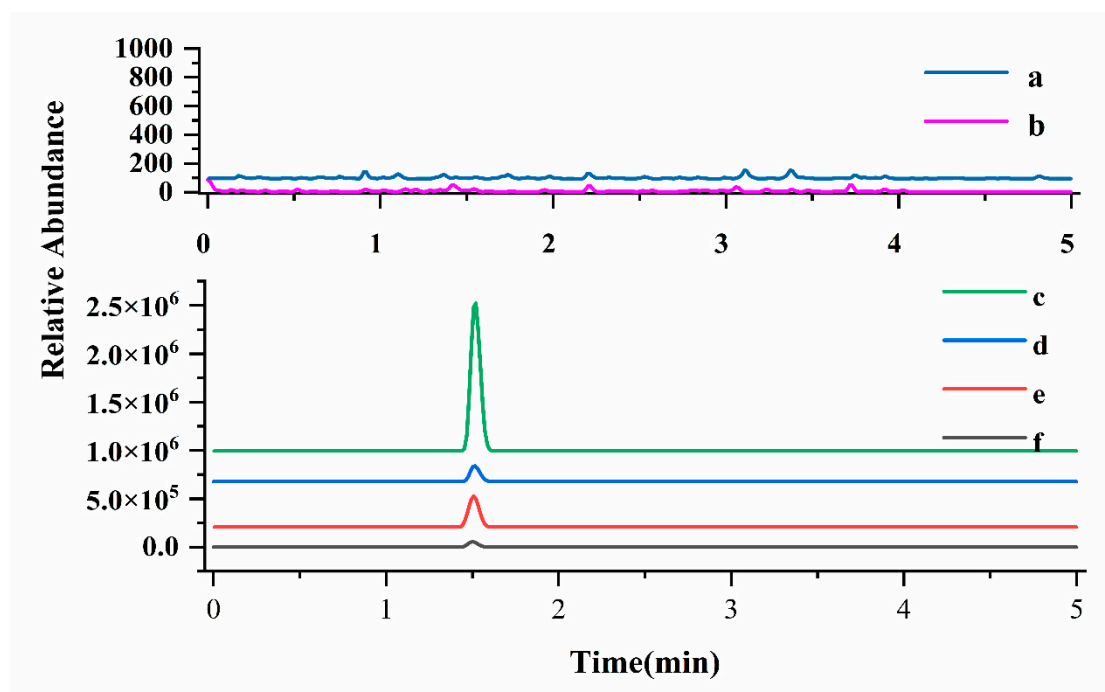

**Supplementary Figure S2** Representative EIC of different liver samples. (a) a: EIC of MASM in control liver tissue; b: EIC of IS in control liver tissue; c: EIC of MASM in liver tissue of rats after administration; d: EIC of IS added in liver tissue of rats after administration of MASM; e: EIC of IS added in control liver tissue; f: EIC of MASM added in control liver tissue.

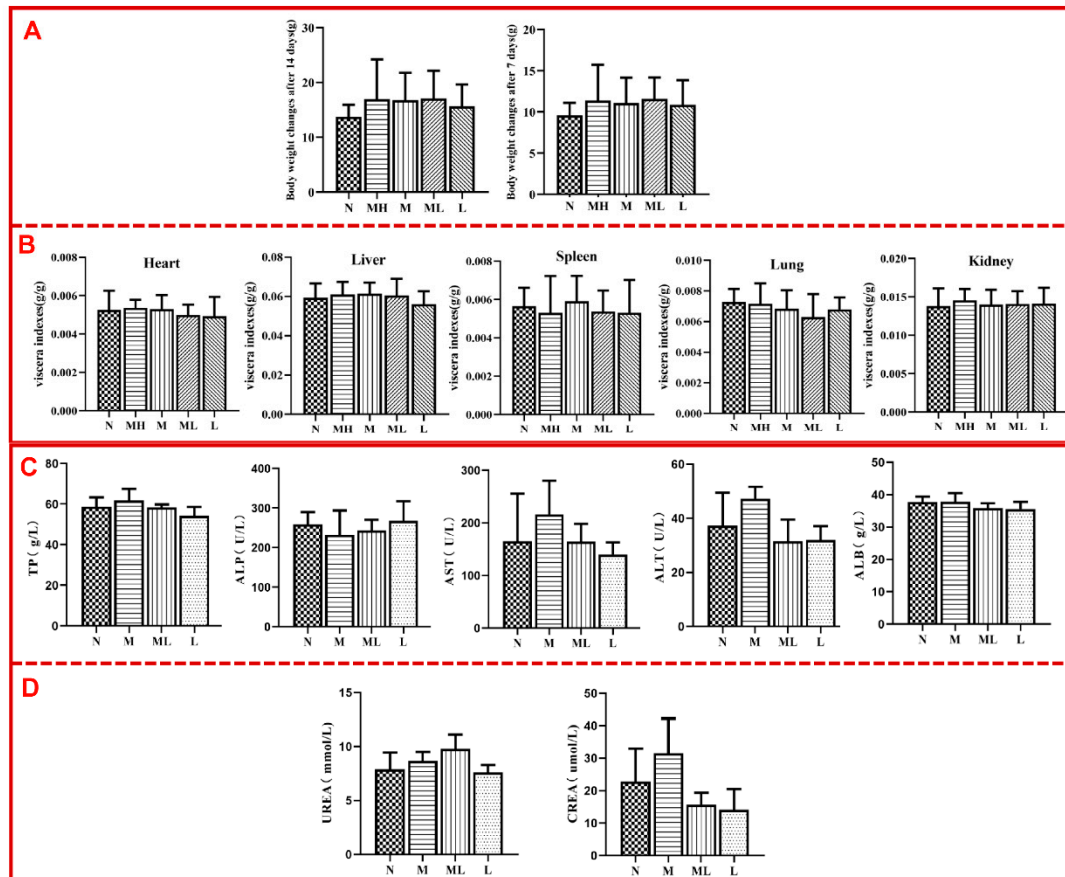

**Supplementary Figure S3** Results of body weight and viscera index as well as the levels of biochemical parameters after intravenous administration of MASM. A: body weight changes of mice on the 7th and 14th day in different groups, respectively; B: the heart, liver, spleen, lung, and kidney viscera index of mice in different groups. C: levels of typical biochemical indicators for function of liver, including TP, ALP, AST, ALT, and ALB; D: levels of typical biochemical indicators for function of kidney, including UREA and CREA.
