# Supplementary material for: Pharmacokinetic, Tissue Distribution, Metabolite, and Toxicity Evaluation of the Matrine Derivative, (6aS, 10S, 11aR, 11bR, 11cS)-10-Methylaminododecahydro-3a, 7a-Diaza-benzo (de) Anthracene-8-thione
Source: MDPI journal article supplement (doi:10.3390/molecules29020297), 2024-01-06
Supplement: s1 [file s1]

**Supplementary File S3** Calibration curves of MASM in each control tissue

| Tissues    | Calibration curve | Correlation coefficient ( <i>r</i> ) |
|------------|-------------------|--------------------------------------|
| heart      | $y=0.29x+1.32$    | 0.9930                               |
| liver      | $y=0.15x+2.24$    | 0.9935                               |
| spleen     | $y=0.38x+0.80$    | 0.9823                               |
| lung       | $y=0.31x+1.21$    | 0.9930                               |
| kidney     | $y=0.23x+0.68$    | 0.9980                               |
| stomach    | $y=0.17x-0.27$    | 0.9975                               |
| intestines | $y=0.12x+0.93$    | 0.9910                               |
| muscle     | $y=0.18x+0.73$    | 0.9980                               |
| brain      | $y=0.09x-0.88$    | 0.9935                               |
