# Supplementary material for: Pharmacokinetic, Tissue Distribution, Metabolite, and Toxicity Evaluation of the Matrine Derivative, (6aS, 10S, 11aR, 11bR, 11cS)-10-Methylaminododecahydro-3a, 7a-Diaza-benzo (de) Anthracene-8-thione
Source: MDPI journal article supplement (doi:10.3390/molecules29020297), 2024-01-06

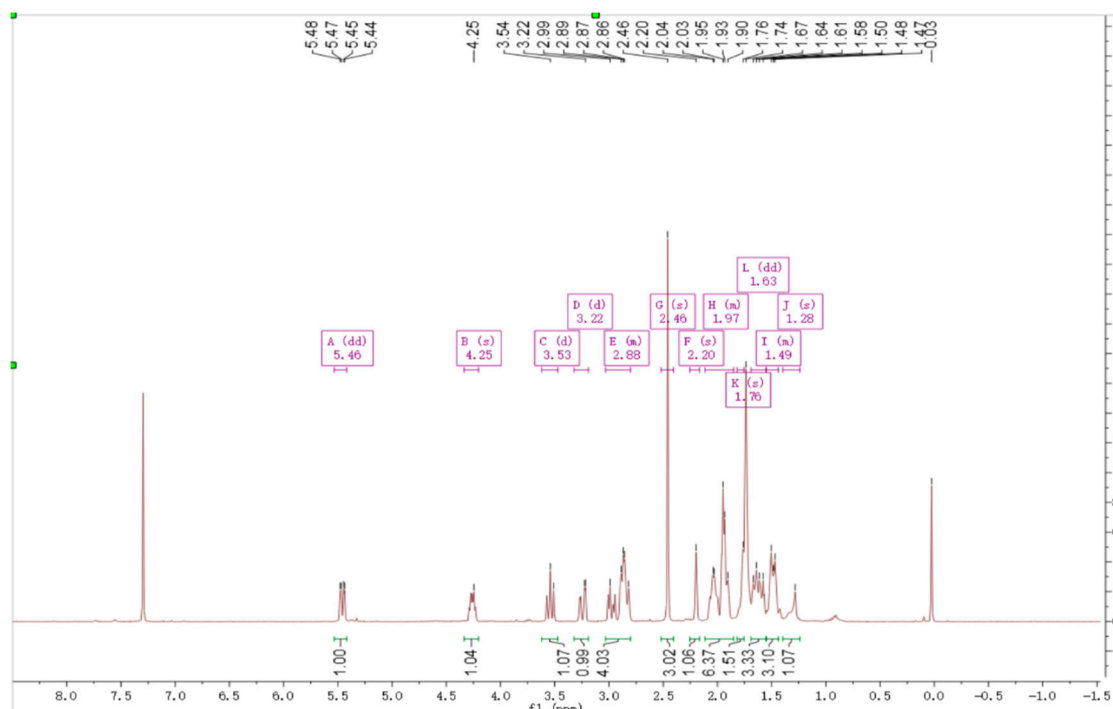

### Display Report

#### Analysis Info

Analysis Name: D:\Data\2021MS\WZY0521\W19\_RB7\_01\_1942.d  
 Method: tune\_low\_20-400\_pos-3min.m  
 Sample Name: M19  
 Comment:

Acquisition Date: 5/21/2021 9:11:41 AM

Operator: gftang  
 Instrument / Ser#: micrOTOF 10257

#### Acquisition Parameter

Source Type: ESI  
 Focus: Not active  
 Scan Begin: 21 m/z  
 Scan End: 400 m/z

Ion Polarity: Positive  
 Set Capillary: 2500 V  
 Set End Plate Offset: -500 V

Set Nebulizer: 1.0 Bar  
 Set Dry Heater: 200 °C  
 Set Dry Gas: 4.0 l/min  
 Set Divert Valve: Waste

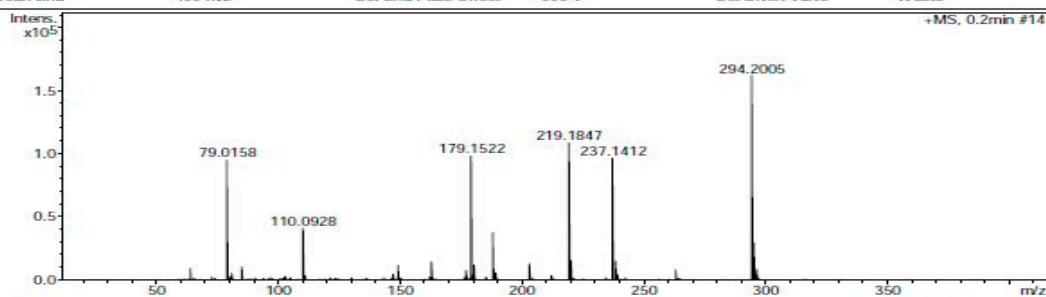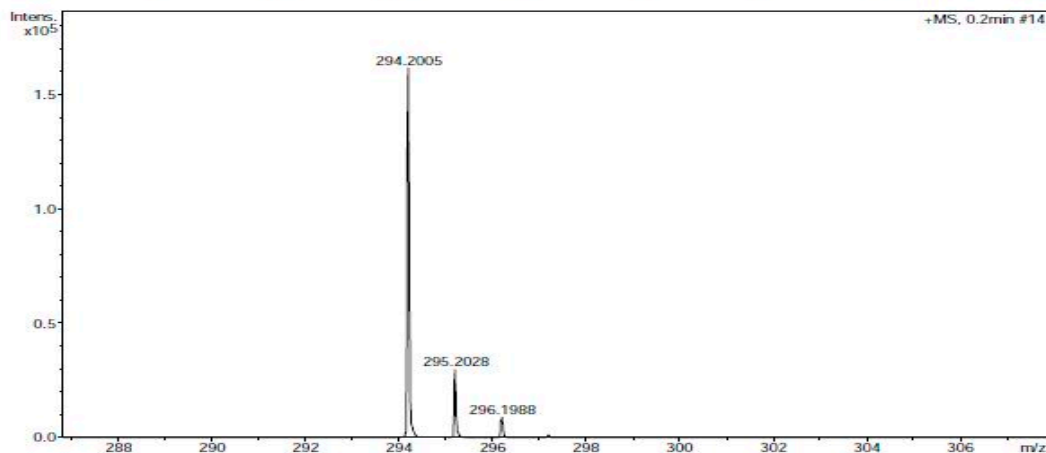

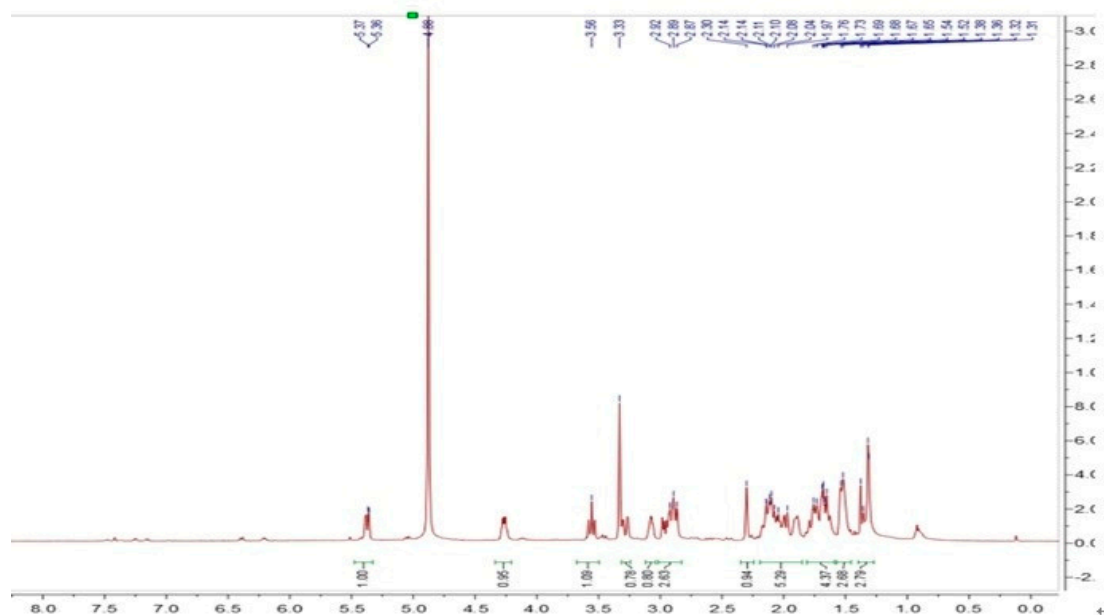

## Generic Display Report

### Analysis Info

Analysis Name D:\Data\2021MS\MSZY1216\dm19-1\_RB3\_01\_586.d  
 Method tune\_low\_20-400\_pos-6min.m  
 Sample Name dm19-1  
 Comment

Acquisition Date 12/16/2021 9:59:11 AM

Operator gftang  
 Instrument micrOTOF

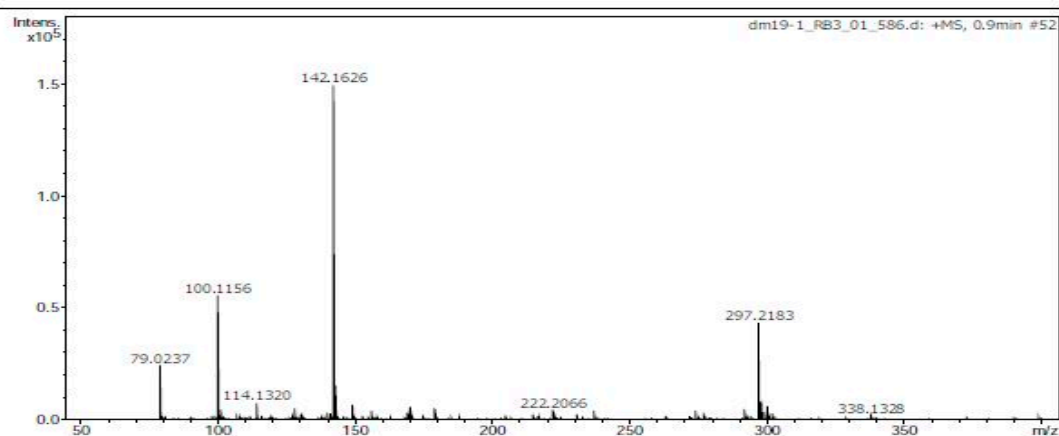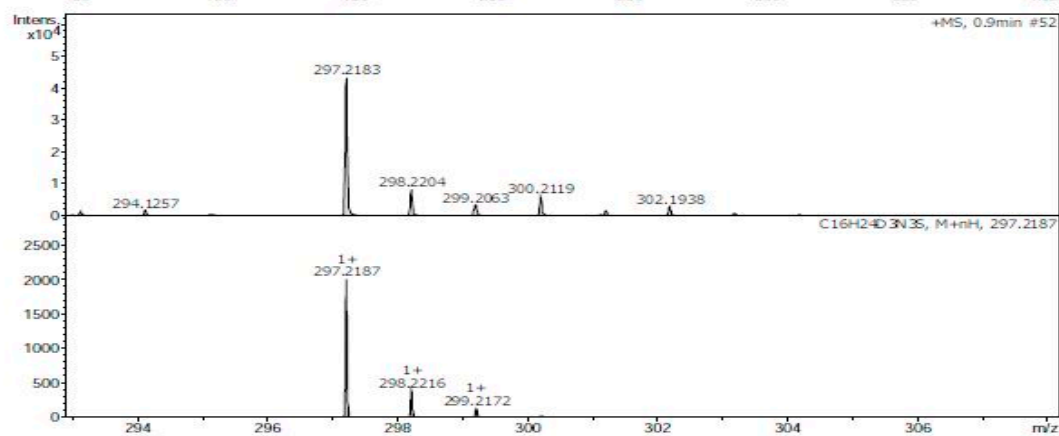

Supplement: s1 [file s1]
